# Supplementary material
Source: PubMed Central journal article supplement (PMC5300770)
Supplement: NIHMS840735-supplement-Suppl.pdf [file NIHMS840735-supplement-Suppl.pdf]

1 Supplemental Information  
2 Mechanistic Study of the Synergistic Antibacterial Activity of Combined Silver  
3 Nanoparticles and Common Antibiotics

4 Hua Deng, Danielle McShan, Ying Zhang, Sudarson S. Sinha, Zikri Arslan, Paresh C.  
5 Ray, and Hongtao Yu\*

6 Department of Chemistry and Biochemistry, Jackson State University, Jackson, MS  
7 39217

8 \* Corresponding Author: Hongtao Yu, [hongtao.yu@jsums.edu](mailto:hongtao.yu@jsums.edu)

9

10 Supplemental materials include:

11 Figure SI 1. Structures of antibiotics used in current study

12 Figure SI 2. Additive antibacterial effect of Ag<sup>+</sup> and tetracycline against *Salmonella*

13 Figure SI 3. UV-vis titration of tetracycline into AgNPs solution

14 Table SI 1. Choice of centrifuge speed to separate *Salmonella* cells from AgNPs solutions

15 Table SI 2. Effect of antibiotics on Ag<sup>+</sup> release

16 Table SI 3. Effect of *Salmonella* cells on Ag<sup>+</sup> release

17 Table SI 4. Estimation of Ag<sup>+</sup> release from AgNPs

18 References

19

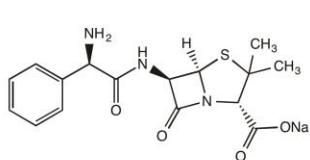

Ampicillin

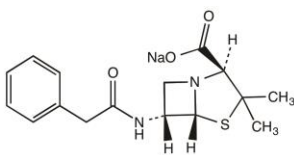

Penicillin

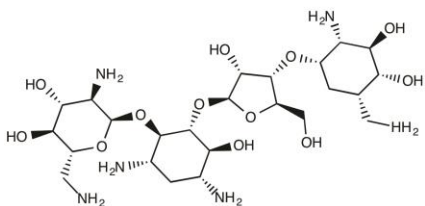

Neomycin

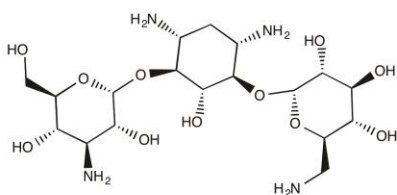

Kanamycin

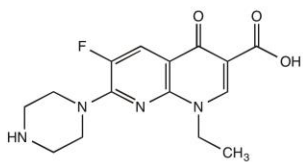

Enoxacin

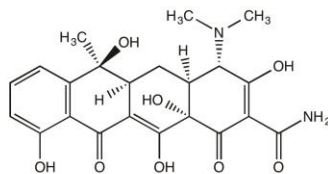

Tetracycline

20

21 **Figure SI 1.** Structures of ampicillin (AMP), penicillin (PEN), neomycin (NEO),  
22 kanamycin (KAN), enoxacin (ENO) and tetracycline (TET).

23

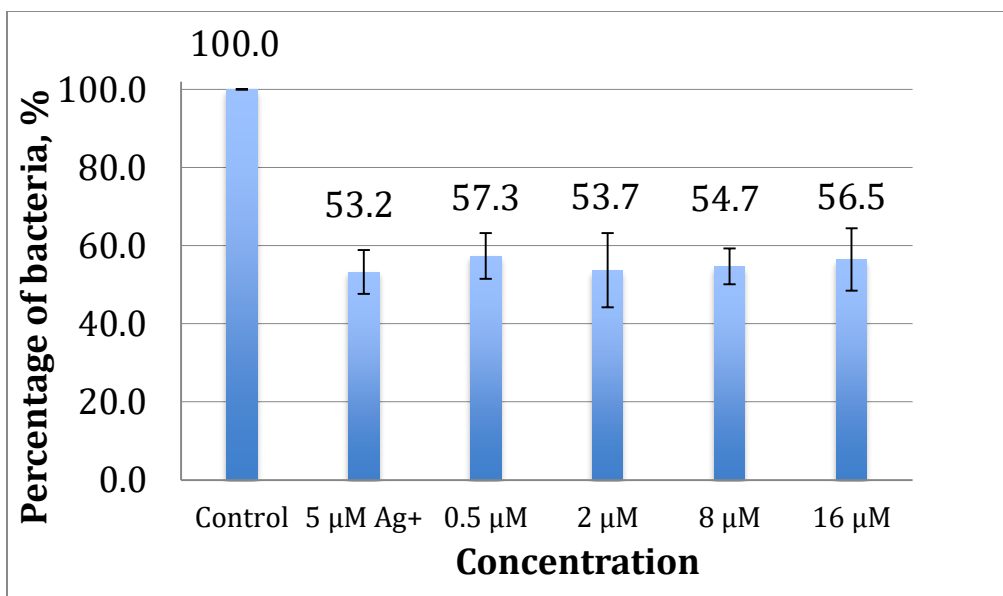

24

25 **Figure SI 2.** Inhibition of 5  $\mu\text{M}$  Ag<sup>+</sup> combined with 0, 0.5, 2, 8, and 16  $\mu\text{M}$  tetracycline  
 26 against  $1 \times 10^5$  CFU/mL *Salmonella* cells. Average counts were obtained from three  
 27 repeats.

28

29 **Additive antibacterial effect of Ag<sup>+</sup> and tetracycline against *Salmonella***

30 As an important control, it needs to be confirmed whether Ag<sup>+</sup> has synergistic effect with  
 31 antibiotics. Tetracycline was chosen as a representative. 5  $\mu\text{M}$  Ag<sup>+</sup> was combined with 0,  
 32 0.5, 2, 8, and 16  $\mu\text{M}$  tetracycline to test their inhibition against  $1 \times 10^5$  CFU/mL bacterial  
 33 cells. All experimental conditions remain the same with AgNPs groups. As shown in  
 34 figure SI 2, all groups inhibit 42.7% - 46.8% of bacterial growth with no significant  
 35 difference, demonstrating that there is no synergistic effect between Ag<sup>+</sup> and tetracycline.

36 No evidence shows Ag<sup>+</sup> and tetracycline have interaction to form “complex” like that  
 37 between AgNPs and tetracycline. Therefore, Ag<sup>+</sup> and tetracycline must carry out  
 38 antibacterial activity separately even when they are combined together. This means there  
 39 should be an additive antibacterial effect between these two antibiotics. However, since  
 40 the *Salmonella* is resistant to tetracycline, the inhibition results observed in this test are  
 41 actually caused by Ag<sup>+</sup>.

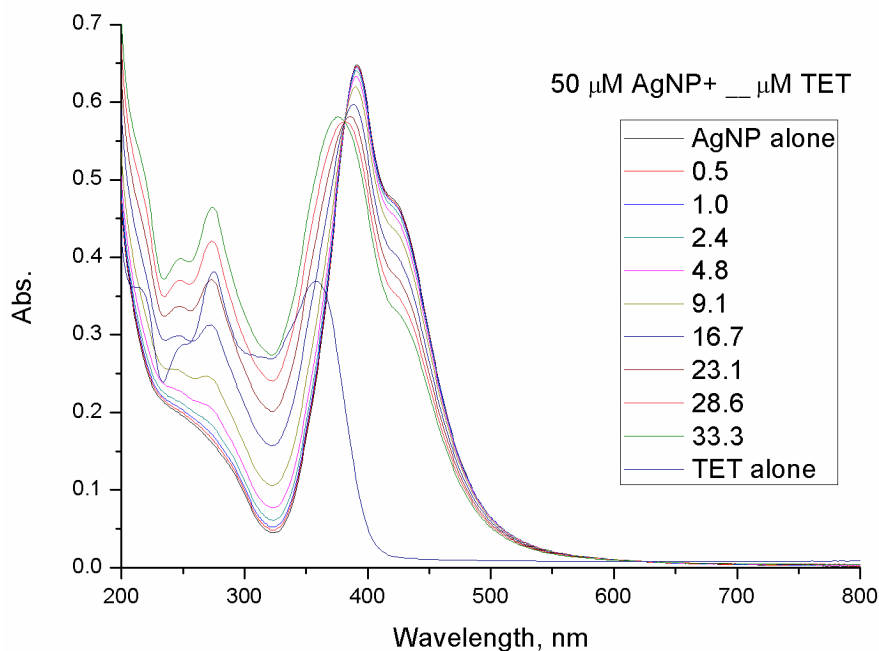

42

43 **Figure SI 3.** UV-vis absorption of titration of 100  $\mu\text{M}$  tetracycline (TET) into AgNPs.

44

#### 45 **UV-vis titration of tetracycline into AgNPs solution**

46 In the experiments of Ag binding to *Salmonella* cells and the  $\text{Ag}^+$  release in the presence  
 47 of bacterial cells, centrifugation is the key method to separate bacteria cells from AgNPs  
 48 in solution or separate released  $\text{Ag}^+$  from solutions. If AgNPs would aggregate, this  
 49 method would not work. To confirm it, 100  $\mu\text{M}$  tetracycline was titrated into 50  $\mu\text{M}$   
 50 AgNPs solutions and characterized by UV-vis absorption. The concentration of  
 51 tetracycline increased from 0 to 33  $\mu\text{M}$  during the titration, but there is no sign of  
 52 aggregation, as shown in figure SI 2. This proves that in this concentration range of  
 53 tetracycline used, it does not cause AgNPs to aggregate.

54

55

56

57 **Table SI 1.** Choice of centrifuge speed to separate *Salmonella* cells from AgNPs  
 58 solutions. AgNPs (100  $\mu$ M) and  $10^6$ - $10^7$  CFU/mL *Salmonella* solutions were used to test  
 59 how centrifuge spin rate affects the settlement of the cells or the AgNPs. At 200 rpm,  
 60 nearly 100% cells settle. Then different concentrations of AgNPs solutions were used to  
 61 test the validity of the separation method of centrifuge at 2,000 rpm for 15 min (below  
 62 table).

| Centrifugation speed, rpm | 100 $\mu$ M AgNPs solution, % remaining in supernatant after centrifugation |             | $10^6$ - $10^7$ CFU/mL <i>Salmonella</i> solution, % remaining in supernatant after centrifugation |             |
|---------------------------|-----------------------------------------------------------------------------|-------------|----------------------------------------------------------------------------------------------------|-------------|
|                           | Average                                                                     | SD          | Average                                                                                            | SD          |
| 0                         | 100.00                                                                      | 0.00        | 100.00                                                                                             | 0.00        |
| 500                       | 99.63                                                                       | 2.40        | 97.64                                                                                              | 2.50        |
| 1000                      | 96.15                                                                       | 2.68        | 83.58                                                                                              | 13.00       |
| 1500                      | 94.09                                                                       | 2.64        | 30.27                                                                                              | 15.34       |
| <b>2000</b>               | <b>88.72</b>                                                                | <b>1.28</b> | <b>5.76</b>                                                                                        | <b>5.46</b> |
| 2500                      | 80.64                                                                       | 1.71        | 3.63                                                                                               | 4.18        |
| 3000                      | 68.64                                                                       | 2.45        | 0.44                                                                                               | 0.83        |
| 3500                      | 60.78                                                                       | 2.26        | \                                                                                                  | \           |

63

| % remaining in supernatant after centrifugation at 2,000 rpm for 15 min |                |               |
|-------------------------------------------------------------------------|----------------|---------------|
|                                                                         | Average        | SD            |
| AgNPs 100 $\mu$ M                                                       | 88.72          | 1.28          |
| AgNPs 50 $\mu$ M                                                        | 91.58          | 1.85          |
| AgNPs 20 $\mu$ M                                                        | 92.47          | 1.3           |
| AgNPs 10 $\mu$ M                                                        | 94.19          | 0.58          |
| AgNPs 5 $\mu$ M                                                         | 96.31          | 1.27          |
| <b>AgNPs 1<math>\mu</math>M *</b>                                       | <b>99.10 *</b> | <b>3.95 *</b> |

64

65 **Table SI 2.** Ag<sup>+</sup> release concentrations and percentages from 1 μM and 50 μM AgNPs  
 66 solutions in presence of various antibiotics (10 μM).

| AgNPs concentrations | 1 μM                 |               | 50 μM                |               |
|----------------------|----------------------|---------------|----------------------|---------------|
|                      | Ag <sup>+</sup> , nM | Ag release, % | Ag <sup>+</sup> , nM | Ag release, % |
| AgNPs                | 96.9 ± 20.1          | 9.7 ± 2.0     | 1046.1 ± 258.3       | 2.1 ± 0.5     |
| AgNPs+ 10 μM AMP     | 103.2 ± 27.4         | 10.3 ± 2.7    | 1068.1 ± 344.1       | 2.1 ± 0.7     |
| AgNPs+ 10 μM PEN     | 97.4 ± 43.6          | 9.7 ± 4.4     | 1145.3 ± 319.0       | 2.3 ± 0.6     |
| AgNPs+ 10 μM ENO     | 134.1 ± 34.9         | 13.4 ± 3.5    | 1395.6 ± 307.1       | 2.8 ± 0.6     |
| AgNPs+ 10 μM KAN     | 134.9 ± 36.3         | 13.5 ± 3.6    | 1485.3 ± 372.8       | 3.0 ± 0.7     |
| AgNPs+ 10 μM NEO     | 154.2 ± 27.6         | 15.4 ± 2.8    | 1579.3 ± 341.6       | 3.2 ± 0.7     |
| AgNPs+ 10 μM TET     | 144.8 ± 20.7         | 14.5 ± 2.1    | 1446.6 ± 281.5       | 2.9 ± 0.6     |

67

68 **Effect of antibiotics on Ag<sup>+</sup> release**

69 As shown in table SI 2, ampicillin and penicillin have no significant effect on the Ag<sup>+</sup>  
 70 release from 1 μM or 50 μM AgNPs solutions. Enoxacin, kanamycin, neomycin and  
 71 tetracycline enhance Ag<sup>+</sup> release by about 3-5% and 0.9-1.1% in cases of 1 μM and 50  
 72 μM AgNPs, respectively. Results both AgNPs concentrations confirm that the interaction  
 73 between antibiotics and AgNPs (formation of complexes) facilitate the Ag<sup>+</sup> release from  
 74 AgNPs.

75 When the concentration of AgNPs increases from 1 μM to 50 μM (50 times increase), the  
 76 released Ag<sup>+</sup> concentrations don't increase by 50 times, but by 10 times. And the Ag<sup>+</sup>  
 77 release percentage even decreased by about 75%, from 8% decreased to 2% in AgNPs  
 78 only group. This demonstrates no linear relationship between Ag<sup>+</sup> release and AgNPs  
 79 concentration. In other words, AgNPs concentration influences Ag<sup>+</sup> release but the whole  
 80 equilibrium system of solution determines the final concentration of Ag<sup>+</sup>.

81

82

83 **Table SI 3.** Ag<sup>+</sup> release concentrations and percentages from 1 μM and 50 μM AgNPs  
 84 solutions in presence of *Salmonella* cells.

| Concentrations              | 1 μM                 |               | 50 μM                |               |
|-----------------------------|----------------------|---------------|----------------------|---------------|
|                             | Ag <sup>+</sup> , nM | Ag release, % | Ag <sup>+</sup> , nM | Ag release, % |
| AgNPs                       | 96.9 ± 20.1          | 9.7 ± 2.0     | 1046.1 ± 258.3       | 2.1 ± 0.5     |
| AgNPs + Cell                | 120.8 ± 34.1         | 12.1 ± 3.4    | 1181.3 ± 201.3       | 2.4 ± 0.4     |
| AgNPs +10 μM PEN            | 97.4 ± 43.6          | 9.7 ± 4.4     | 1145.3 ± 319.0       | 2.3 ± 0.6     |
| AgNPs + 10 μM PEN<br>+ Cell | 122.8 ± 25.7         | 12.3 ± 2.6    | 1274.4 ± 305.4       | 2.5 ± 0.6     |
| AgNPs + 10μM TET            | 144.8 ± 20.7         | 14.5 ± 2.1    | 1446.6 ± 281.5       | 2.9 ± 0.6     |
| AgNPs + 10 μM TET<br>+ Cell | 182.4 ± 25.8         | 18.2 ± 2.6    | 1627.7 ± 203.3       | 3.3 ± 0.4     |

85

86

87 **Effect of *Salmonella* cells on Ag<sup>+</sup> release**

88 The presence of *Salmonella* further enhances Ag<sup>+</sup> release in all experimental groups  
 89 regardless of the AgNPs concentrations, as shown in table SI 3. The Ag<sup>+</sup> ion release from  
 90 AgNPs depends on the coating agents, size and concentration of AgNPs as well as other  
 91 environmental factors, including temperature, pH values, dissolved dioxygen and protons  
 92 <sup>1-3</sup>. In current experimental conditions, antibiotic molecules that have interaction with  
 93 AgNPs enhance the Ag<sup>+</sup> ion release from AgNPs. Since AgNPs surface absorbs and is  
 94 covered with Ag<sup>+</sup> ions, the interaction between antibiotics and AgNPs facilitates the  
 95 release of Ag<sup>+</sup> ion. Especially, the competition between antibiotics and citrate causes the  
 96 leaving of citrate ions, which helps the leaving of Ag<sup>+</sup> ions from AgNPs by forming  
 97 citrate complex with Ag<sup>+</sup> <sup>4</sup>. On the other hand, the presence of antibiotics will bring an  
 98 environment of more dissolved dioxygen and protons, promoting conversion from Ag(0)  
 99 to Ag(I) <sup>5, 6</sup>. For the same reason, the complex biological system of bacterial cells will  
 100 promote conversion of AgNPs to Ag(I) and trigger enhanced Ag<sup>+</sup> release.

101

103 **Table SI 4.** Estimated number of released Ag<sup>+</sup> from every surface layer of AgNPs.

| Layer of a single AgNP (outside to inside) | Radius r, nm | Surface area, S=4πr <sup>2</sup> , nm <sup>2</sup> | Estimated Number, N = S/S <sub>Ag</sub> , × 10 <sup>4</sup> | Total Ag <sup>+</sup> upon complete release, × 10 <sup>4</sup> | Total Ag <sup>+</sup> release of 30 AgNPs, × 10 <sup>5</sup> | Total Ag <sup>+</sup> release of 37 AgNPs, × 10 <sup>5</sup> | Total Ag <sup>+</sup> release of 73 AgNPs, × 10 <sup>5</sup> |
|--------------------------------------------|--------------|----------------------------------------------------|-------------------------------------------------------------|----------------------------------------------------------------|--------------------------------------------------------------|--------------------------------------------------------------|--------------------------------------------------------------|
| 1                                          | 14.9         | 2789.9                                             | 3.0                                                         | 3.0                                                            | 9.0                                                          | 11.1                                                         | 21.9                                                         |
| 2                                          | 14.6         | 2662.5                                             | 2.9                                                         | 5.9                                                            | 17.6                                                         | 21.7                                                         | 42.8                                                         |
| 3                                          | 14.2         | 2538.2                                             | 2.7                                                         | 8.6                                                            | 25.8                                                         | 31.8                                                         | 62.8                                                         |
| 4                                          | 13.9         | 2416.8                                             | 2.6                                                         | 11.2                                                           | 33.6                                                         | 41.4                                                         | 81.7                                                         |
| 5                                          | 13.5         | 2298.4                                             | 2.5                                                         | 13.7                                                           | 41.0                                                         | 50.6                                                         | 99.8                                                         |
| 6                                          | 13.2         | 2182.9                                             | 2.3                                                         | 16.0                                                           | 48.1                                                         | 59.3                                                         | 116.9                                                        |
| 7                                          | 12.8         | 2070.5                                             | 2.2                                                         | 18.2                                                           | 54.7                                                         | 67.5                                                         | 133.2                                                        |
| 8                                          | 12.5         | 1961.0                                             | 2.1                                                         | 20.4                                                           | 61.1                                                         | 75.3                                                         | 148.6                                                        |
| 9                                          | 12.1         | 1854.5                                             | 2.0                                                         | 22.4                                                           | 67.1                                                         | 82.7                                                         | 163.2                                                        |
| 10                                         | 11.8         | 1750.9                                             | 1.9                                                         | 24.2                                                           | 72.7                                                         | 89.7                                                         | 176.9                                                        |
| 11                                         | 11.5         | 1650.4                                             | 1.8                                                         | 26.0                                                           | 78.0                                                         | 96.2                                                         | 189.9                                                        |
| 12                                         | 11.1         | 1552.8                                             | 1.7                                                         | 27.7                                                           | 83.0                                                         | 102.4                                                        | 202.1                                                        |

104 Notes: Average diameter of 29.8 nm is used for spherical AgNPs, giving an original  
 105 radius of 14.9 nm. Van der Waals radius of Ag atom is known to be 172 pm, yielding an  
 106 area of AgNPs cross-section of S<sub>Ag</sub> = πr<sup>2</sup> = 0.09294 nm<sup>2</sup>.

107

#### 108 Estimation of Ag<sup>+</sup> release from each AgNP

109 The rough number of Ag atoms on the surface of every single AgNP is estimated by the  
 110 surface area of AgNPs dividing by the cross section area of a single Ag atom, as listed in  
 111 table SI 4. Assuming Ag<sup>+</sup> ions are released from the surface of AgNPs layer by layer, we  
 112 can estimate the Ag<sup>+</sup> release capability of different layer of every single AgNP.

113 In the case of 1 μM AgNPs interacting with 1x10<sup>7</sup> CFU/mL *Salmonella*, 30 and 37  
 114 AgNPs out of 73 AgNPs have interaction or bind to every *Salmonella* cell in absence and  
 115 presence of tetracycline, respectively. And released Ag<sup>+</sup> concentrations are 121 and 182  
 116 nM, indicating Ag<sup>+</sup> ions to *Salmonella* cell ratios are 7.28 × 10<sup>6</sup> : 1 and 10.96 × 10<sup>6</sup> : 1 in  
 117 absence and presence of tetracycline, respectively. There is an increase of 3.68 × 10<sup>6</sup> Ag<sup>+</sup>  
 118 release triggered by a single *Salmonella* cell. Compared with total Ag<sup>+</sup> release of 37  
 119 AgNPs listed in table SI 4, combination of tetracycline and *Salmonella* cells facilitate the  
 120 release of about 3 layers of Ag on the surface of AgNPs.

121

#### 122 References



- 123 1. Kittler, S.; Greulich, C.; Diendorf, J.; Koller, M.; Epple, M., Toxicity of silver  
124 nanoparticles increases during storage because of slow dissolution under release of silver  
125 ions. *Chemistry of Materials* **2010**, *22*, (16), 4548-4554.
- 126 2. Liu, J.; Hurt, R. H., Ion release kinetics and particle persistence in aqueous nano-  
127 silver colloids. *Environmental science & technology* **2010**, *44*, (6), 2169-2175.
- 128 3. Fabrega, J.; Fawcett, S. R.; Renshaw, J. C.; Lead, J. R., Silver nanoparticle impact  
129 on bacterial growth: effect of pH, concentration, and organic matter. *Environmental*  
130 *science & technology* **2009**, *43*, (19), 7285-7290.
- 131 4. Canamares, M.; Garcia-Ramos, J.; Gomez-Varga, J.; Domingo, C.; Sanchez-  
132 Cortes, S., Comparative study of the morphology, aggregation, adherence to glass, and  
133 surface-enhanced Raman scattering activity of silver nanoparticles prepared by chemical  
134 reduction of Ag<sup>+</sup> using citrate and hydroxylamine. *Langmuir* **2005**, *21*, (18), 8546-8553.
- 135 5. Lee, Y. J.; Kim, J.; Oh, J.; Bae, S.; Lee, S.; Hong, I. S.; Kim, S. H., Ion-release  
136 kinetics and ecotoxicity effects of silver nanoparticles. *Environmental toxicology and*  
137 *chemistry* **2012**, *31*, (1), 155-159.
- 138 6. Klitzke, S.; Metreveli, G.; Peters, A.; Schaumann, G. E.; Lang, F., The fate of  
139 silver nanoparticles in soil solution—Sorption of solutes and aggregation. *Science of The*  
140 *Total Environment* **2015**, *535*, 54-60.

141

142
